# Supplementary material for: The AMPK agonist 5‐aminoimidazole‐4‐carboxamide ribonucleotide (AICAR), but not metformin, prevents inflammation‐associated cachectic muscle wasting
Source: PubMed Central journal article supplement (PMC6034131; doi:10.15252/emmm.201708307), 2018-05-29
Supplement: EMMM-10-e8307-s001.pdf [file EMMM-10-e8307-s001.pdf]

# Appendix

## The AMPK agonist 5-Aminoimidazole-4-carboxamide ribonucleotide (AICAR), but not metformin, prevents inflammation-associated cachectic muscle wasting

Derek T. Hall<sup>1,2</sup>, Takla Griss<sup>2,4</sup>, Jennifer F. Ma<sup>1,2</sup>, Brenda Janice Sanchez<sup>1,2</sup>, Jason Sadek<sup>1,2</sup>, Anne Marie K. Tremblay<sup>1,2</sup>, Souad Mubaid<sup>1,2</sup>, Amr Omer<sup>1,2</sup>, Rebecca J. Ford<sup>5</sup>, Nathalie Bedard<sup>6</sup>, Arnim Pause<sup>1,2</sup>, Simon S. Wing<sup>6</sup>, Sergio Di Marco<sup>1,2</sup>, Gregory R. Steinberg<sup>5</sup>, Russell G. Jones<sup>2,4</sup>, and Imed-Eddine Gallouzi<sup>1,2,3\*</sup>

|                                                                                                                       |           |
|-----------------------------------------------------------------------------------------------------------------------|-----------|
| <b>Table of Content</b>                                                                                               | ... 1     |
| <b>Appendix Figure S1.</b> Overexpression of AMPK $\alpha$ increases C2C12 sensitivity to AICAR                       | ... 2     |
| <b>Appendix Figure S2.</b> Consecutive daily AICAR or metformin treatment does not affect body weight or muscle mass. | ... 3     |
| <b>Appendix Figure S3.</b> Single doses of AICAR or metformin alone do not affect body weight or muscle mass.         | ... 4     |
| <b>Appendix Table S1.</b> qPCR Primer Sequences                                                                       | ... 5     |
| <b>Appendix Table S2.</b> Figure 1 Significance p-values                                                              | ... 6     |
| <b>Appendix Table S3.</b> Figure 2 Significance p-values                                                              | ... 7     |
| <b>Appendix Table S4.</b> Figure 3 Significance p-values                                                              | ... 8     |
| <b>Appendix Table S5.</b> Figure 4 Significance p-values                                                              | ... 8     |
| <b>Appendix Table S6.</b> Figure 5 Significance p-values                                                              | ... 9-10  |
| <b>Appendix Table S7.</b> Figure 6 Significance p-values                                                              | ... 11    |
| <b>Appendix Table S8.</b> Figure 7 Significance p-values                                                              | ... 12-14 |
| <b>Appendix Table S9.</b> Figure 8 Significance p-values                                                              | ... 15    |
| <b>Appendix Table S10.</b> Figure 9 Significance p-values                                                             | ... 15    |
| <b>Appendix Table S11.</b> Figure EV3 Significance p-values                                                           | ... 16    |
| <b>Appendix Table S12.</b> Figure EV4 Significance p-values                                                           | ... 16    |
| <b>Appendix Table S13.</b> Figure EV5 Significance p-values                                                           | ... 17    |
| <b>Appendix Table S14.</b> Table 1 Significance p-values                                                              | ... 18    |
| <b>Appendix Table S14.</b> Table 2 Significance p-values                                                              | ... 19    |

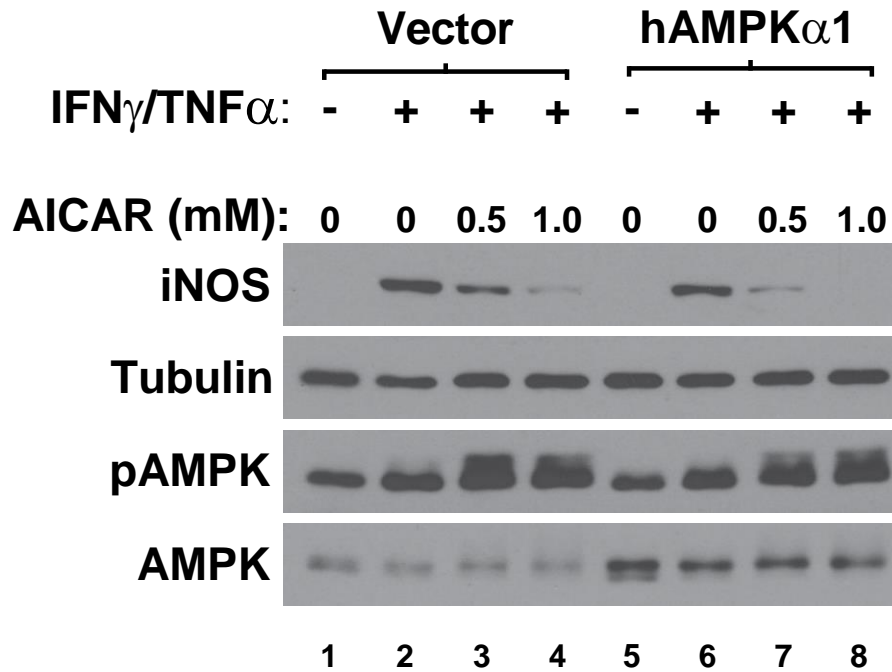

**Appendix Figure S1. Overexpression of AMPK $\alpha$  increases C2C12 sensitivity to AICAR.**

C2C12 myoblast cells were transfected with constructs expressing human AMPK $\alpha$ 1 (hAMPK $\alpha$ 1) or an empty vector negative control (Vector). Cells were then treated with IFN $\gamma$ /TNF $\alpha$  and the indicated doses of AICAR. Western blot analysis performed for protein levels of iNOS, tubulin, and phosphor-Thr172-AMPK (pAMPK), and total AMPK.

**A**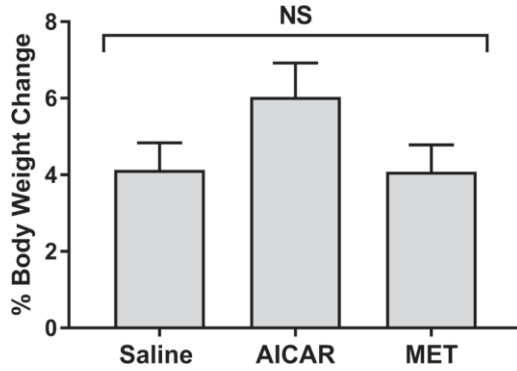**B**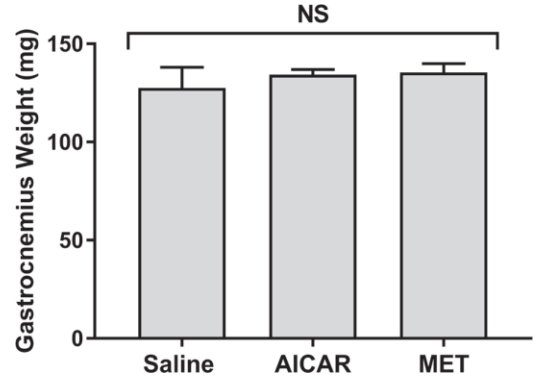**C**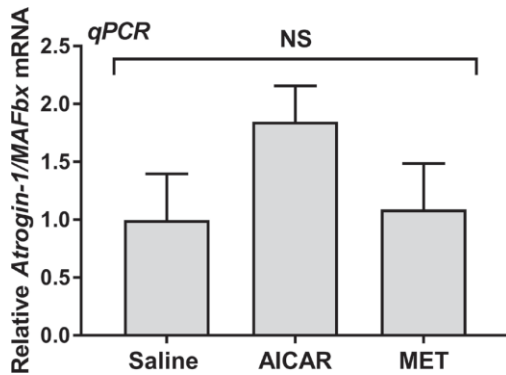**D**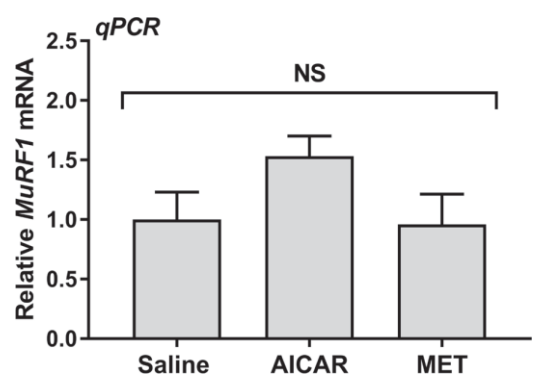

**Appendix Figure S2. Consecutive daily AICAR or metformin treatment does not affect body weight or muscle mass.**

BALB/C mice were intraperitoneally injected daily with AICAR ( $500\text{mg kg}^{-1}\text{ day}^{-1}$ ), metformin ( $250\text{mg kg}^{-1}\text{ day}^{-1}$ ), or an equivalent volume of saline for 7-9 days.

(A) Percent body weight change.

(B) Gastrocnemius muscle weights.

(C-D) RT-qPCR analysis of Atrogin-1/MAFbx (C) and MuRF1 (D) mRNA expression from the tibialis anterior.

Data information: Results are derived from four mice per cohort ( $n = 4$ ) and error bars represent the SEM. Significance between means was determined using ANOVA. NS, not significant.

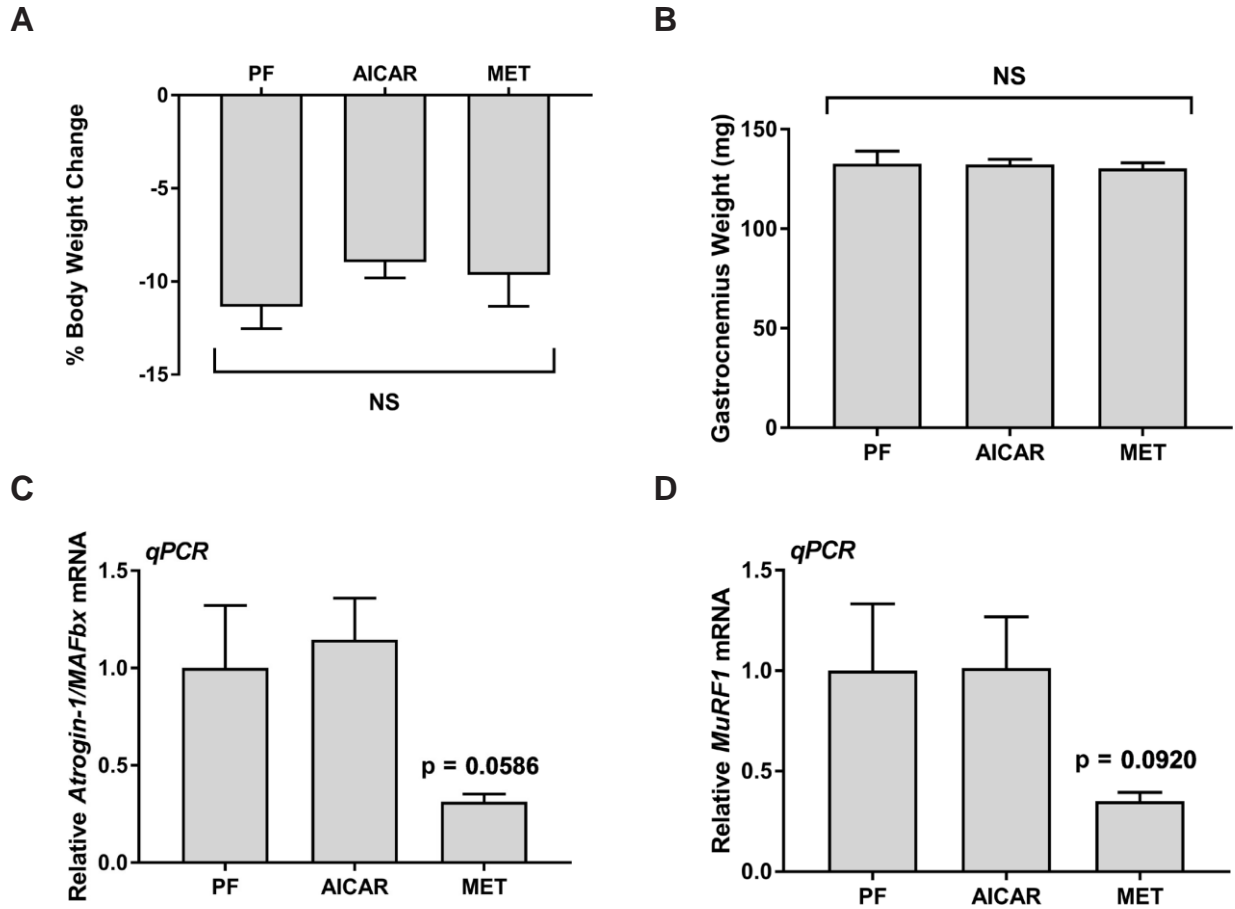

**Appendix Figure S3. Single doses of AICAR or metformin alone do not affect body weight or muscle mass.**

C57Bl/6 mice were intraperitoneally injected with either AICAR (500mg kg<sup>-1</sup>), metformin (250mg kg<sup>-1</sup>), or an equivalent volume of saline. All cohorts were pair-fed (PF) to the food consumption rate of LPS injected mice. Tissue samples were collected 18h later.

(A) Percent body weight change.

(B) Gastrocnemius muscle weights.

(C-D) RT-qPCR analysis of Atrogin-1/MAFbx (C) and MuRF1 (D) mRNA expression from the tibialis anterior.

Data information: Results are derived from four mice per cohort (n = 4) and error bars represent the SEM. Significance between means was first determined using ANOVA. Significance p-values were calculated using Fisher's LSD. NS, not significant.

**Appendix Table S1. qPCR Primer Sequences.**

| Gene          | Protein             | Gene ID | Forward Primer (5'-3')    | Reverse Primer (5'-3') |
|---------------|---------------------|---------|---------------------------|------------------------|
| <i>Nos2</i>   | iNOS                | 18126   | GTGCGCATGGCTCGGGATGT      | GGCTGTCAGAGCCTCGTGGC   |
| <i>Gapdh</i>  | GAPDH               | 14433   | AAGGTCATCCCAGAGCTGAA      | AGGAGACAACCTGGTCCTCA   |
| <i>Myod1</i>  | MyoD                | 17927   | CGACACCGCCTACTACAGTG      | TTCTGTGTCGCTTAGGGATG   |
| <i>Myog</i>   | Myogenin            | 17928   | CTACAGGCCTTGCTCAGCTC      | AGATTGTGGGCGTCTGTAGG   |
| <i>Fbxo3</i>  | Atrogin-1<br>/MAFbx | 67731   | GACCGGCTACTGTGGAAGAG      | CCAGGAGAGAATGTGGCAGT   |
| <i>Trim63</i> | MuRF1               | 433766  | GAGCAAGGCTTTGAGAACATGGACT | GCGTCCAGAGCGTGTCTCACT  |

**Appendix Table S2. Figure 1 Significance p-values.**

| Figure | Panel         | Control                    | Treatment                          | p-value  | Symbol |
|--------|---------------|----------------------------|------------------------------------|----------|--------|
| 1      | A, pAMPK/AMPK | NT                         | AICAR                              | 0.0026   | **     |
| 1      | A, pAMPK/AMPK | NT                         | MET                                | < 0.0001 | **     |
| 1      | A, pAMPK/AMPK | NT                         | IFN $\gamma$ /TNF $\alpha$         | < 0.0001 | **     |
| 1      | A, pAMPK/AMPK | NT                         | IFN $\gamma$ /TNF $\alpha$ + AICAR | 0.0003   | **     |
| 1      | A, pAMPK/AMPK | NT                         | IFN $\gamma$ /TNF $\alpha$ + MET   | 0.0002   | **     |
| 1      | A, pAMPK/AMPK | IFN $\gamma$ /TNF $\alpha$ | IFN $\gamma$ /TNF $\alpha$ + AICAR | 0.0923   | -      |
| 1      | A, pAMPK/AMPK | IFN $\gamma$ /TNF $\alpha$ | IFN $\gamma$ /TNF $\alpha$ + MET   | 0.1301   | -      |
| 1      | A, pACC/ACC   | NT                         | AICAR                              | 0.0013   | **     |
| 1      | A, pACC/ACC   | NT                         | MET                                | 0.0247   | *      |
| 1      | A, pACC/ACC   | NT                         | IFN $\gamma$ /TNF $\alpha$         | 0.0015   | **     |
| 1      | A, pACC/ACC   | NT                         | IFN $\gamma$ /TNF $\alpha$ + AICAR | 0.0010   | **     |
| 1      | A, pACC/ACC   | NT                         | IFN $\gamma$ /TNF $\alpha$ + MET   | 0.0342   | *      |
| 1      | A, pACC/ACC   | IFN $\gamma$ /TNF $\alpha$ | IFN $\gamma$ /TNF $\alpha$ + AICAR | 0.7911   | -      |
| 1      | A, pACC/ACC   | IFN $\gamma$ /TNF $\alpha$ | IFN $\gamma$ /TNF $\alpha$ + MET   | 0.1180   | -      |
| 1      | C             | NT                         | AICAR                              | 0.4964   | -      |
| 1      | C             | NT                         | MET                                | 0.0287   | *      |
| 1      | C             | NT                         | IFN $\gamma$ /TNF $\alpha$         | 0.0033   | **     |
| 1      | C             | NT                         | IFN $\gamma$ /TNF $\alpha$ + AICAR | 0.9965   | -      |
| 1      | C             | NT                         | IFN $\gamma$ /TNF $\alpha$ + MET   | 0.0009   | **     |
| 1      | C             | IFN $\gamma$ /TNF $\alpha$ | IFN $\gamma$ /TNF $\alpha$ + AICAR | 0.0033   | -      |
| 1      | C             | IFN $\gamma$ /TNF $\alpha$ | IFN $\gamma$ /TNF $\alpha$ + MET   | 0.4991   | -      |
| 1      | D             | NT                         | AICAR                              | 0.0047   | **     |
| 1      | D             | NT                         | MET                                | 0.1318   | -      |
| 1      | D             | NT                         | IFN $\gamma$ /TNF $\alpha$         | < 0.0001 | **     |
| 1      | D             | NT                         | IFN $\gamma$ /TNF $\alpha$ + AICAR | 0.0002   | **     |
| 1      | D             | NT                         | IFN $\gamma$ /TNF $\alpha$ + MET   | < 0.0001 | **     |
| 1      | D             | IFN $\gamma$ /TNF $\alpha$ | IFN $\gamma$ /TNF $\alpha$ + AICAR | 0.0004   | ††     |
| 1      | D             | IFN $\gamma$ /TNF $\alpha$ | IFN $\gamma$ /TNF $\alpha$ + MET   | 0.9299   | -      |
| 1      | E             | NT                         | AICAR                              | 0.6955   | -      |
| 1      | E             | NT                         | MET                                | 0.9582   | -      |
| 1      | E             | NT                         | IFN $\gamma$ /TNF $\alpha$         | 0.0062   | **     |
| 1      | E             | NT                         | IFN $\gamma$ /TNF $\alpha$ + AICAR | 0.7342   | -      |
| 1      | E             | NT                         | IFN $\gamma$ /TNF $\alpha$ + MET   | 0.0059   | **     |
| 1      | E             | IFN $\gamma$ /TNF $\alpha$ | IFN $\gamma$ /TNF $\alpha$ + AICAR | 0.0118   | -      |
| 1      | E             | IFN $\gamma$ /TNF $\alpha$ | IFN $\gamma$ /TNF $\alpha$ + MET   | 0.9791   | -      |

Abbreviations: NT, non-treated. MET, metformin.

**Appendix Table S3. Figure 2 Significance p-values.**

| Figure | Panel | Control                    | Treatment                          | p-value | Symbol |
|--------|-------|----------------------------|------------------------------------|---------|--------|
| 2      | A     | NT                         | AICAR                              | 0.7561  | -      |
| 2      | A     | NT                         | MET                                | 0.0165  | *      |
| 2      | A     | NT                         | IFN $\gamma$ /TNF $\alpha$         | 0.0025  | **     |
| 2      | A     | NT                         | IFN $\gamma$ /TNF $\alpha$ + AICAR | 0.4003  | -      |
| 2      | A     | NT                         | IFN $\gamma$ /TNF $\alpha$ + MET   | 0.0005  | **     |
| 2      | A     | IFN $\gamma$ /TNF $\alpha$ | IFN $\gamma$ /TNF $\alpha$ + AICAR | 0.0125  | -      |
| 2      | A     | IFN $\gamma$ /TNF $\alpha$ | IFN $\gamma$ /TNF $\alpha$ + MET   | 0.4025  | -      |
| 2      | B     | NT                         | AICAR                              | 0.9267  | -      |
| 2      | B     | NT                         | MET                                | 0.0208  | *      |
| 2      | B     | NT                         | IFN $\gamma$ /TNF $\alpha$         | 0.0025  | **     |
| 2      | B     | NT                         | IFN $\gamma$ /TNF $\alpha$ + AICAR | 0.1200  | -      |
| 2      | B     | NT                         | IFN $\gamma$ /TNF $\alpha$ + MET   | 0.0019  | **     |
| 2      | B     | IFN $\gamma$ /TNF $\alpha$ | IFN $\gamma$ /TNF $\alpha$ + AICAR | 0.0549  | -      |
| 2      | B     | IFN $\gamma$ /TNF $\alpha$ | IFN $\gamma$ /TNF $\alpha$ + MET   | 0.8694  | -      |

Abbreviations: NT, non-treated. MET, metformin.

**Appendix Table S4. Figure 3 Significance p-values.**

| Figure | Panel       | Control                    | Treatment                          | p-value | Symbol |
|--------|-------------|----------------------------|------------------------------------|---------|--------|
| 3      | A, pS6K/S6K | NT                         | AICAR                              | 0.0954  | -      |
| 3      | A, pS6K/S6K | NT                         | MET                                | 0.1038  | -      |
| 3      | A, pS6K/S6K | NT                         | IFN $\gamma$ /TNF $\alpha$         | <0.0001 | **     |
| 3      | A, pS6K/S6K | NT                         | IFN $\gamma$ /TNF $\alpha$ + AICAR | 0.0380  | *      |
| 3      | A, pS6K/S6K | NT                         | IFN $\gamma$ /TNF $\alpha$ + MET   | <0.0001 | **     |
| 3      | A, pS6K/S6K | IFN $\gamma$ /TNF $\alpha$ | IFN $\gamma$ /TNF $\alpha$ + AICAR | 0.0005  | ++     |
| 3      | A, pS6K/S6K | IFN $\gamma$ /TNF $\alpha$ | IFN $\gamma$ /TNF $\alpha$ + MET   | 0.8461  | -      |
| 3      | A, pS6/S6   | NT                         | AICAR                              | 0.8372  | -      |
| 3      | A, pS6/S6   | NT                         | MET                                | 0.8911  | -      |
| 3      | A, pS6/S6   | NT                         | IFN $\gamma$ /TNF $\alpha$         | 0.0372  | *      |
| 3      | A, pS6/S6   | NT                         | IFN $\gamma$ /TNF $\alpha$ + AICAR | 0.7753  | -      |
| 3      | A, pS6/S6   | NT                         | IFN $\gamma$ /TNF $\alpha$ + MET   | 0.0435  | *      |
| 3      | A, pS6/S6   | IFN $\gamma$ /TNF $\alpha$ | IFN $\gamma$ /TNF $\alpha$ + AICAR | 0.0205  | -      |
| 3      | A, pS6/S6   | IFN $\gamma$ /TNF $\alpha$ | IFN $\gamma$ /TNF $\alpha$ + MET   | 0.9382  | -      |
| 3      | B           | NT                         | AICAR                              | 0.7810  | -      |
| 3      | B           | NT                         | MET                                | 0.1265  | -      |
| 3      | B           | NT                         | IFN $\gamma$ /TNF $\alpha$         | 0.0007  | **     |
| 3      | B           | NT                         | IFN $\gamma$ /TNF $\alpha$ + AICAR | 0.1411  | -      |
| 3      | B           | NT                         | IFN $\gamma$ /TNF $\alpha$ + MET   | 0.0001  | **     |
| 3      | B           | IFN $\gamma$ /TNF $\alpha$ | IFN $\gamma$ /TNF $\alpha$ + AICAR | 0.0119  | -      |
| 3      | B           | IFN $\gamma$ /TNF $\alpha$ | IFN $\gamma$ /TNF $\alpha$ + MET   | 0.2845  | -      |

Abbreviations: NT, non-treated. MET, metformin.

**Appendix Table S5. Figure 4 Significance p-values.**

| Figure | Panel | Control                                                | Treatment                                               | p-value | Symbol |
|--------|-------|--------------------------------------------------------|---------------------------------------------------------|---------|--------|
| 4      | A     | IFN $\gamma$ /TNF $\alpha$                             | IFN $\gamma$ /TNF $\alpha$ + AICAR                      | 0.0005  | ++     |
| 4      | A     | IFN $\gamma$ /TNF $\alpha$                             | IFN $\gamma$ /TNF $\alpha$ + MET                        | 0.3321  | -      |
| 4      | B     | IFN $\gamma$ /TNF $\alpha$                             | IFN $\gamma$ /TNF $\alpha$ + AICAR                      | 0.0014  | ++     |
| 4      | B     | IFN $\gamma$ /TNF $\alpha$                             | IFN $\gamma$ /TNF $\alpha$ + MET                        | 0.3702  | -      |
| 4      | C     | IFN $\gamma$ /TNF $\alpha$                             | IFN $\gamma$ /TNF $\alpha$ + AICAR                      | <0.0001 | ++     |
| 4      | C     | IFN $\gamma$ /TNF $\alpha$                             | IFN $\gamma$ /TNF $\alpha$ + MET                        | 0.1597  | -      |
| 4      | D     | siCTL<br>+ IFN $\gamma$ /TNF $\alpha$<br>+ AICAR 0.5mM | siAMPK<br>+ IFN $\gamma$ /TNF $\alpha$<br>+ AICAR 0.5mM | 0.0071  | **     |
| 4      | D     | siCTL<br>+ IFN $\gamma$ /TNF $\alpha$<br>+ AICAR 1.0mM | siAMPK<br>+ IFN $\gamma$ /TNF $\alpha$<br>+ AICAR 1.0mM | 0.0206  | *      |

Abbreviations: MET, metformin.



**Appendix Table S6. Figure 5 Significance p-values.**

| Figure | Panel         | Control                    | Treatment                               | p-value | Symbol |
|--------|---------------|----------------------------|-----------------------------------------|---------|--------|
| 5      | A, pAMPK/AMPK | NT                         | AICAR                                   | 0.0203  | *      |
| 5      | A, pAMPK/AMPK | NT                         | CC                                      | 0.9541  | -      |
| 5      | A, pAMPK/AMPK | NT                         | CC + AICAR                              | 0.0217  | *      |
| 5      | A, pACC/ACC   | NT                         | AICAR                                   | 0.0010  | **     |
| 5      | A, pACC/ACC   | NT                         | CC                                      | 0.5689  | -      |
| 5      | A, pACC/ACC   | NT                         | CC + AICAR                              | 0.2597  | -      |
| 5      | B             | NT                         | AICAR                                   | 0.0264  | *      |
| 5      | B             | NT                         | IFN $\gamma$ /TNF $\alpha$              | 0.0008  | **     |
| 5      | B             | NT                         | IFN $\gamma$ /TNF $\alpha$ + AICAR      | 0.0672  | -      |
| 5      | B             | NT                         | CC                                      | 0.1400  | -      |
| 5      | B             | NT                         | CC + AICAR                              | 0.1231  | -      |
| 5      | B             | NT                         | CC + IFN $\gamma$ /TNF $\alpha$         | 0.0168  | *      |
| 5      | B             | NT                         | CC + IFN $\gamma$ /TNF $\alpha$ + AICAR | 0.0331  | *      |
| 5      | B             | IFN $\gamma$ /TNF $\alpha$ | IFN $\gamma$ /TNF $\alpha$ + AICAR      | <0.0001 | -      |
| 5      | B             | IFN $\gamma$ /TNF $\alpha$ | CC + IFN $\gamma$ /TNF $\alpha$         | 0.1689  | -      |
| 5      | B             | IFN $\gamma$ /TNF $\alpha$ | CC + IFN $\gamma$ /TNF $\alpha$ + AICAR | 0.0940  | -      |
| 5      | C             | NT                         | AICAR                                   | <0.0001 | **     |
| 5      | C             | NT                         | IFN $\gamma$ /TNF $\alpha$              | <0.0001 | **     |
| 5      | C             | NT                         | IFN $\gamma$ /TNF $\alpha$ + AICAR      | 0.3061  | -      |
| 5      | C             | NT                         | CC                                      | <0.0001 | **     |
| 5      | C             | NT                         | CC + AICAR                              | <0.0001 | **     |
| 5      | C             | NT                         | CC + IFN $\gamma$ /TNF $\alpha$         | <0.0001 | **     |
| 5      | C             | NT                         | CC + IFN $\gamma$ /TNF $\alpha$ + AICAR | <0.0001 | **     |
| 5      | C             | IFN $\gamma$ /TNF $\alpha$ | IFN $\gamma$ /TNF $\alpha$ + AICAR      | <0.0001 | -      |
| 5      | C             | IFN $\gamma$ /TNF $\alpha$ | CC + IFN $\gamma$ /TNF $\alpha$         | 0.7305  | -      |
| 5      | C             | IFN $\gamma$ /TNF $\alpha$ | CC + IFN $\gamma$ /TNF $\alpha$ + AICAR | <0.0001 | -      |
| 5      | D             | NT                         | AICAR                                   | 0.2850  | -      |
| 5      | D             | NT                         | IFN $\gamma$ /TNF $\alpha$              | <0.0001 | **     |
| 5      | D             | NT                         | IFN $\gamma$ /TNF $\alpha$ + AICAR      | 0.0032  | **     |
| 5      | D             | NT                         | CC                                      | 0.3247  | -      |
| 5      | D             | NT                         | CC + AICAR                              | 0.4981  | -      |
| 5      | D             | NT                         | CC + IFN $\gamma$ /TNF $\alpha$         | <0.0001 | **     |
| 5      | D             | NT                         | CC + IFN $\gamma$ /TNF $\alpha$ + AICAR | 0.0002  | **     |
| 5      | D             | IFN $\gamma$ /TNF $\alpha$ | IFN $\gamma$ /TNF $\alpha$ + AICAR      | 0.0202  | †      |
| 5      | D             | IFN $\gamma$ /TNF $\alpha$ | CC + IFN $\gamma$ /TNF $\alpha$         | 0.9443  | -      |
| 5      | D             | IFN $\gamma$ /TNF $\alpha$ | CC + IFN $\gamma$ /TNF $\alpha$ + AICAR | 0.1561  | -      |
| 5      | E, pS6K/S6K   | NT                         | AICAR                                   | 0.1220  | -      |

|   |             |                            |                                         |         |    |
|---|-------------|----------------------------|-----------------------------------------|---------|----|
| 5 | E, pS6K/S6K | NT                         | IFN $\gamma$ /TNF $\alpha$              | <0.0001 | ** |
| 5 | E, pS6K/S6K | NT                         | IFN $\gamma$ /TNF $\alpha$ + AICAR      | 0.8872  | -  |
| 5 | E, pS6K/S6K | NT                         | CC                                      | 0.0073  | ** |
| 5 | E, pS6K/S6K | NT                         | CC + AICAR                              | <0.0001 | ** |
| 5 | E, pS6K/S6K | NT                         | CC + IFN $\gamma$ /TNF $\alpha$         | <0.0001 | ** |
| 5 | E, pS6K/S6K | NT                         | CC + IFN $\gamma$ /TNF $\alpha$ + AICAR | <0.0001 | ** |
| 5 | E, pS6K/S6K | IFN $\gamma$ /TNF $\alpha$ | IFN $\gamma$ /TNF $\alpha$ + AICAR      | <0.0001 | -  |
| 5 | E, pS6K/S6K | IFN $\gamma$ /TNF $\alpha$ | CC + IFN $\gamma$ /TNF $\alpha$         | 0.9411  | -  |
| 5 | E, pS6K/S6K | IFN $\gamma$ /TNF $\alpha$ | CC + IFN $\gamma$ /TNF $\alpha$ + AICAR | 0.9537  | -  |
| 5 | E, pS6/S6   | NT                         | AICAR                                   | 0.1713  | -  |
| 5 | E, pS6/S6   | NT                         | IFN $\gamma$ /TNF $\alpha$              | 0.0065  | ** |
| 5 | E, pS6/S6   | NT                         | IFN $\gamma$ /TNF $\alpha$ + AICAR      | 0.8046  | -  |
| 5 | E, pS6/S6   | NT                         | CC                                      | 0.4632  | -  |
| 5 | E, pS6/S6   | NT                         | CC + AICAR                              | 0.2567  | -  |
| 5 | E, pS6/S6   | NT                         | CC + IFN $\gamma$ /TNF $\alpha$         | 0.0067  | ** |
| 5 | E, pS6/S6   | NT                         | CC + IFN $\gamma$ /TNF $\alpha$ + AICAR | 0.0064  | ** |
| 5 | E, pS6/S6   | IFN $\gamma$ /TNF $\alpha$ | IFN $\gamma$ /TNF $\alpha$ + AICAR      | 0.0038  | -  |
| 5 | E, pS6/S6   | IFN $\gamma$ /TNF $\alpha$ | CC + IFN $\gamma$ /TNF $\alpha$         | 0.9881  | -  |
| 5 | E, pS6/S6   | IFN $\gamma$ /TNF $\alpha$ | CC + IFN $\gamma$ /TNF $\alpha$ + AICAR | 0.9945  | -  |
| 5 | F           | IFN $\gamma$ /TNF $\alpha$ | IFN $\gamma$ /TNF $\alpha$ + AICAR      | 0.0103  | †  |
| 5 | F           | IFN $\gamma$ /TNF $\alpha$ | CC + IFN $\gamma$ /TNF $\alpha$         | 0.6912  | -  |
| 5 | F           | IFN $\gamma$ /TNF $\alpha$ | CC + IFN $\gamma$ /TNF $\alpha$ + AICAR | 0.4240  | -  |

Abbreviations: NT, non-treated. CC, Compound C

**Appendix Table S7. Figure 6 Significance p-values**

| Figure | Panel       | Control                           | Treatment                             | p-value | Symbol |
|--------|-------------|-----------------------------------|---------------------------------------|---------|--------|
| 6      | A           | DMSO                              | A-769662                              | 0.1967  | -      |
| 6      | A           | DMSO                              | IFN $\gamma$ /TNF $\alpha$ + DMSO     | 0.0029  | **     |
| 6      | A           | DMSO                              | IFN $\gamma$ /TNF $\alpha$ + A-769662 | 0.6624  | -      |
| 6      | A           | IFN $\gamma$ /TNF $\alpha$ + DMSO | IFN $\gamma$ /TNF $\alpha$ + A-769662 | 0.0016  | -      |
| 6      | B           | DMSO                              | A-769662                              | 0.0011  | **     |
| 6      | B           | DMSO                              | IFN $\gamma$ /TNF $\alpha$ + DMSO     | <0.0001 | **     |
| 6      | B           | DMSO                              | IFN $\gamma$ /TNF $\alpha$ + A-769662 | 0.1628  | -      |
| 6      | B           | IFN $\gamma$ /TNF $\alpha$ + DMSO | IFN $\gamma$ /TNF $\alpha$ + A-769662 | <0.0001 | -      |
| 6      | C           | DMSO                              | A-769662                              | 0.0815  | -      |
| 6      | C           | DMSO                              | IFN $\gamma$ /TNF $\alpha$ + DMSO     | 0.0031  | **     |
| 6      | C           | DMSO                              | IFN $\gamma$ /TNF $\alpha$ + A-769662 | >0.9999 | -      |
| 6      | C           | IFN $\gamma$ /TNF $\alpha$ + DMSO | IFN $\gamma$ /TNF $\alpha$ + A-769662 | 0.0031  | -      |
| 6      | D, pS6K/S6K | DMSO                              | A-769662                              | 0.9780  | -      |
| 6      | D, pS6K/S6K | DMSO                              | IFN $\gamma$ /TNF $\alpha$ + DMSO     | 0.0060  | **     |
| 6      | D, pS6K/S6K | DMSO                              | IFN $\gamma$ /TNF $\alpha$ + A-769662 | 0.0501  | -      |
| 6      | D, pS6K/S6K | IFN $\gamma$ /TNF $\alpha$ + DMSO | IFN $\gamma$ /TNF $\alpha$ + A-769662 | 0.0003  | -      |
| 6      | D, pS6/S6   | DMSO                              | A-769662                              | 0.5221  | -      |
| 6      | D, pS6/S6   | DMSO                              | IFN $\gamma$ /TNF $\alpha$ + DMSO     | 0.0011  | **     |
| 6      | D, pS6/S6   | DMSO                              | IFN $\gamma$ /TNF $\alpha$ + A-769662 | 0.0650  | -      |
| 6      | D, pS6/S6   | IFN $\gamma$ /TNF $\alpha$ + DMSO | IFN $\gamma$ /TNF $\alpha$ + A-769662 | 0.0221  | -      |
| 6      | E           | IFN $\gamma$ /TNF $\alpha$ + DMSO | IFN $\gamma$ /TNF $\alpha$ + A-769662 | 0.0002  | ††     |
| 6      | F           | IFN $\gamma$ /TNF $\alpha$ + DMSO | IFN $\gamma$ /TNF $\alpha$ + A-769662 | 0.0001  | ††     |
| 6      | G           | IFN $\gamma$ /TNF $\alpha$ + DMSO | IFN $\gamma$ /TNF $\alpha$ + A-769662 | <0.0001 | ††     |

**Appendix Table S8. Figure 7 Significance p-values**

| Figure | Panel | Control                              | Treatment                                                               | p-value | Symbol |
|--------|-------|--------------------------------------|-------------------------------------------------------------------------|---------|--------|
| 7      | A     | DMSO                                 | A-769662 25 $\mu$ M                                                     | 0.7863  | -      |
| 7      | A     | DMSO                                 | A-769662 50 $\mu$ M                                                     | 0.4685  | -      |
| 7      | A     | DMSO                                 | IFN $\gamma$ /TNF $\alpha$<br>+ DMSO                                    | <0.0001 | **     |
| 7      | A     | DMSO                                 | IFN $\gamma$ /TNF $\alpha$<br>+ A-769662 25 $\mu$ M                     | 0.0004  | **     |
| 7      | A     | DMSO                                 | IFN $\gamma$ /TNF $\alpha$<br>+ A-769662 50 $\mu$ M                     | 0.0002  | **     |
| 7      | A     | DMSO                                 | IFN $\gamma$ /TNF $\alpha$ + AICAR 125 $\mu$ M<br>+ DMSO                | 0.0002  | **     |
| 7      | A     | DMSO                                 | IFN $\gamma$ /TNF $\alpha$ + AICAR 125 $\mu$ M<br>+ A-769662 25 $\mu$ M | 0.0010  | **     |
| 7      | A     | DMSO                                 | IFN $\gamma$ /TNF $\alpha$ + AICAR 125 $\mu$ M<br>+ A-769662 50 $\mu$ M | 0.0034  | **     |
| 7      | A     | DMSO                                 | IFN $\gamma$ /TNF $\alpha$ + AICAR 250 $\mu$ M<br>+ DMSO                | 0.0006  | **     |
| 7      | A     | DMSO                                 | IFN $\gamma$ /TNF $\alpha$ + AICAR 250 $\mu$ M<br>+ A-769662 25 $\mu$ M | 0.0647  | -      |
| 7      | A     | DMSO                                 | IFN $\gamma$ /TNF $\alpha$ + AICAR 250 $\mu$ M<br>+ A-769662 50 $\mu$ M | 0.8389  | -      |
| 7      | A     | IFN $\gamma$ /TNF $\alpha$<br>+ DMSO | IFN $\gamma$ /TNF $\alpha$<br>+ A-769662 25 $\mu$ M                     | 0.2053  | -      |
| 7      | A     | IFN $\gamma$ /TNF $\alpha$<br>+ DMSO | IFN $\gamma$ /TNF $\alpha$<br>+ A-769662 50 $\mu$ M                     | 0.3064  | -      |
| 7      | A     | IFN $\gamma$ /TNF $\alpha$<br>+ DMSO | IFN $\gamma$ /TNF $\alpha$ + AICAR 125 $\mu$ M<br>+ DMSO                | 0.3386  | -      |
| 7      | A     | IFN $\gamma$ /TNF $\alpha$<br>+ DMSO | IFN $\gamma$ /TNF $\alpha$ + AICAR 125 $\mu$ M<br>+ A-769662 25 $\mu$ M | 0.1028  | -      |
| 7      | A     | IFN $\gamma$ /TNF $\alpha$<br>+ DMSO | IFN $\gamma$ /TNF $\alpha$ + AICAR 125 $\mu$ M<br>+ A-769662 50 $\mu$ M | 0.0382  | †      |
| 7      | A     | IFN $\gamma$ /TNF $\alpha$<br>+ DMSO | IFN $\gamma$ /TNF $\alpha$ + AICAR 250 $\mu$ M<br>+ DMSO                | 0.1491  | -      |
| 7      | A     | IFN $\gamma$ /TNF $\alpha$<br>+ DMSO | IFN $\gamma$ /TNF $\alpha$ + AICAR 250 $\mu$ M<br>+ A-769662 25 $\mu$ M | 0.0018  | -      |
| 7      | A     | IFN $\gamma$ /TNF $\alpha$<br>+ DMSO | IFN $\gamma$ /TNF $\alpha$ + AICAR 250 $\mu$ M<br>+ A-769662 50 $\mu$ M | <0.0001 | -      |
| 7      | B     | IFN $\gamma$ /TNF $\alpha$<br>+ DMSO | IFN $\gamma$ /TNF $\alpha$<br>+ A-769662 25 $\mu$ M                     | 0.4926  | -      |
| 7      | B     | IFN $\gamma$ /TNF $\alpha$<br>+ DMSO | IFN $\gamma$ /TNF $\alpha$<br>+ A-769662 50 $\mu$ M                     | 0.2623  | -      |
| 7      | B     | IFN $\gamma$ /TNF $\alpha$<br>+ DMSO | IFN $\gamma$ /TNF $\alpha$ + AICAR 125 $\mu$ M<br>+ DMSO                | 0.0797  | -      |

|   |                |                                      |                                                                         |         |    |
|---|----------------|--------------------------------------|-------------------------------------------------------------------------|---------|----|
| 7 | B              | IFN $\gamma$ /TNF $\alpha$<br>+ DMSO | IFN $\gamma$ /TNF $\alpha$ + AICAR 125 $\mu$ M<br>+ A-769662 25 $\mu$ M | 0.6749  | -  |
| 7 | B              | IFN $\gamma$ /TNF $\alpha$<br>+ DMSO | IFN $\gamma$ /TNF $\alpha$ + AICAR 125 $\mu$ M<br>+ A-769662 50 $\mu$ M | 0.0025  | ++ |
| 7 | B              | IFN $\gamma$ /TNF $\alpha$<br>+ DMSO | IFN $\gamma$ /TNF $\alpha$ + AICAR 250 $\mu$ M<br>+ DMSO                | <0.0001 | ++ |
| 7 | B              | IFN $\gamma$ /TNF $\alpha$<br>+ DMSO | IFN $\gamma$ /TNF $\alpha$ + AICAR 250 $\mu$ M<br>+ A-769662 25 $\mu$ M | <0.0001 | ++ |
| 7 | B              | IFN $\gamma$ /TNF $\alpha$<br>+ DMSO | IFN $\gamma$ /TNF $\alpha$ + AICAR 250 $\mu$ M<br>+ A-769662 50 $\mu$ M | <0.0001 | ++ |
| 7 | C,<br>pS6K/S6K | DMSO                                 | A-769662 25 $\mu$ M                                                     | 0.0325  | *  |
| 7 | C,<br>pS6K/S6K | DMSO                                 | A-769662 50 $\mu$ M                                                     | 0.0661  | -  |
| 7 | C,<br>pS6K/S6K | DMSO                                 | IFN $\gamma$ /TNF $\alpha$<br>+ DMSO                                    | <0.0001 | ** |
| 7 | C,<br>pS6K/S6K | DMSO                                 | IFN $\gamma$ /TNF $\alpha$<br>+ A-769662 25 $\mu$ M                     | <0.0001 | ** |
| 7 | C,<br>pS6K/S6K | DMSO                                 | IFN $\gamma$ /TNF $\alpha$<br>+ A-769662 50 $\mu$ M                     | <0.0001 | ** |
| 7 | C,<br>pS6K/S6K | DMSO                                 | IFN $\gamma$ /TNF $\alpha$ + AICAR 125 $\mu$ M<br>+ DMSO                | <0.0001 | ** |
| 7 | C,<br>pS6K/S6K | DMSO                                 | IFN $\gamma$ /TNF $\alpha$ + AICAR 125 $\mu$ M<br>+ A-769662 25 $\mu$ M | <0.0001 | ** |
| 7 | C,<br>pS6K/S6K | DMSO                                 | IFN $\gamma$ /TNF $\alpha$ + AICAR 125 $\mu$ M<br>+ A-769662 50 $\mu$ M | <0.0001 | ** |
| 7 | C,<br>pS6K/S6K | DMSO                                 | IFN $\gamma$ /TNF $\alpha$ + AICAR 250 $\mu$ M<br>+ DMSO                | <0.0001 | ** |
| 7 | C,<br>pS6K/S6K | DMSO                                 | IFN $\gamma$ /TNF $\alpha$ + AICAR 250 $\mu$ M<br>+ A-769662 25 $\mu$ M | 0.0069  | ** |
| 7 | C,<br>pS6K/S6K | DMSO                                 | IFN $\gamma$ /TNF $\alpha$ + AICAR 250 $\mu$ M<br>+ A-769662 50 $\mu$ M | 0.0809  | -  |
| 7 | C,<br>pS6K/S6K | IFN $\gamma$ /TNF $\alpha$<br>+ DMSO | IFN $\gamma$ /TNF $\alpha$<br>+ A-769662 25 $\mu$ M                     | 0.7856  | -  |
| 7 | C,<br>pS6K/S6K | IFN $\gamma$ /TNF $\alpha$<br>+ DMSO | IFN $\gamma$ /TNF $\alpha$<br>+ A-769662 50 $\mu$ M                     | 0.7596  | -  |
| 7 | C,<br>pS6K/S6K | IFN $\gamma$ /TNF $\alpha$<br>+ DMSO | IFN $\gamma$ /TNF $\alpha$ + AICAR 125 $\mu$ M<br>+ DMSO                | 0.7596  | -  |
| 7 | C,<br>pS6K/S6K | IFN $\gamma$ /TNF $\alpha$<br>+ DMSO | IFN $\gamma$ /TNF $\alpha$ + AICAR 125 $\mu$ M<br>+ A-769662 25 $\mu$ M | 0.8918  | -  |
| 7 | C,<br>pS6K/S6K | IFN $\gamma$ /TNF $\alpha$<br>+ DMSO | IFN $\gamma$ /TNF $\alpha$ + AICAR 125 $\mu$ M<br>+ A-769662 50 $\mu$ M | 0.0039  | ++ |
| 7 | C,<br>pS6K/S6K | IFN $\gamma$ /TNF $\alpha$<br>+ DMSO | IFN $\gamma$ /TNF $\alpha$ + AICAR 250 $\mu$ M<br>+ DMSO                | 0.0350  | †  |

|   |             |                                   |                                                                      |         |    |
|---|-------------|-----------------------------------|----------------------------------------------------------------------|---------|----|
| 7 | C, pS6K/S6K | IFN $\gamma$ /TNF $\alpha$ + DMSO | IFN $\gamma$ /TNF $\alpha$ + AICAR 250 $\mu$ M + A-769662 25 $\mu$ M | <0.0001 | ++ |
| 7 | C, pS6K/S6K | IFN $\gamma$ /TNF $\alpha$ + DMSO | IFN $\gamma$ /TNF $\alpha$ + AICAR 250 $\mu$ M + A-769662 50 $\mu$ M | <0.0001 | -  |
| 7 | C, pS6/S6   | DMSO                              | A-769662 25 $\mu$ M                                                  | 0.7896  | -  |
| 7 | C, pS6/S6   | DMSO                              | A-769662 50 $\mu$ M                                                  | 0.6209  | -  |
| 7 | C, pS6/S6   | DMSO                              | IFN $\gamma$ /TNF $\alpha$ + DMSO                                    | <0.0001 | ** |
| 7 | C, pS6/S6   | DMSO                              | IFN $\gamma$ /TNF $\alpha$ + A-769662 25 $\mu$ M                     | <0.0001 | ** |
| 7 | C, pS6/S6   | DMSO                              | IFN $\gamma$ /TNF $\alpha$ + A-769662 50 $\mu$ M                     | <0.0001 | ** |
| 7 | C, pS6/S6   | DMSO                              | IFN $\gamma$ /TNF $\alpha$ + AICAR 125 $\mu$ M + DMSO                | <0.0001 | ** |
| 7 | C, pS6/S6   | DMSO                              | IFN $\gamma$ /TNF $\alpha$ + AICAR 125 $\mu$ M + A-769662 25 $\mu$ M | <0.0001 | ** |
| 7 | C, pS6/S6   | DMSO                              | IFN $\gamma$ /TNF $\alpha$ + AICAR 125 $\mu$ M + A-769662 50 $\mu$ M | 0.0004  | ** |
| 7 | C, pS6/S6   | DMSO                              | IFN $\gamma$ /TNF $\alpha$ + AICAR 250 $\mu$ M + DMSO                | <0.0001 | ** |
| 7 | C, pS6/S6   | DMSO                              | IFN $\gamma$ /TNF $\alpha$ + AICAR 250 $\mu$ M + A-769662 25 $\mu$ M | 0.0017  | ** |
| 7 | C, pS6/S6   | DMSO                              | IFN $\gamma$ /TNF $\alpha$ + AICAR 250 $\mu$ M + A-769662 50 $\mu$ M | 0.0994  | -  |
| 7 | C, pS6/S6   | IFN $\gamma$ /TNF $\alpha$ + DMSO | IFN $\gamma$ /TNF $\alpha$ + A-769662 25 $\mu$ M                     | 0.7981  | -  |
| 7 | C, pS6/S6   | IFN $\gamma$ /TNF $\alpha$ + DMSO | IFN $\gamma$ /TNF $\alpha$ + A-769662 50 $\mu$ M                     | 0.9773  | -  |
| 7 | C, pS6/S6   | IFN $\gamma$ /TNF $\alpha$ + DMSO | IFN $\gamma$ /TNF $\alpha$ + AICAR 125 $\mu$ M + DMSO                | 0.9094  | -  |
| 7 | C, pS6/S6   | IFN $\gamma$ /TNF $\alpha$ + DMSO | IFN $\gamma$ /TNF $\alpha$ + AICAR 125 $\mu$ M + A-769662 25 $\mu$ M | 0.4134  | -  |
| 7 | C, pS6/S6   | IFN $\gamma$ /TNF $\alpha$ + DMSO | IFN $\gamma$ /TNF $\alpha$ + AICAR 125 $\mu$ M + A-769662 50 $\mu$ M | 0.0012  | ++ |
| 7 | C, pS6/S6   | IFN $\gamma$ /TNF $\alpha$ + DMSO | IFN $\gamma$ /TNF $\alpha$ + AICAR 250 $\mu$ M + DMSO                | 0.3984  | -  |
| 7 | C, pS6/S6   | IFN $\gamma$ /TNF $\alpha$ + DMSO | IFN $\gamma$ /TNF $\alpha$ + AICAR 250 $\mu$ M + A-769662 25 $\mu$ M | 0.0021  | ++ |
| 7 | C, pS6/S6   | IFN $\gamma$ /TNF $\alpha$ + DMSO | IFN $\gamma$ /TNF $\alpha$ + AICAR 250 $\mu$ M + A-769662 50 $\mu$ M | <0.0001 | -  |

**Appendix Table S9. Figure 8 Significance p-values**

| Figure | Panel | Control | Treatment   | p-value | Symbol |
|--------|-------|---------|-------------|---------|--------|
| 8      | C     | Saline  | C26         | <0.0001 | **     |
| 8      | C     | Saline  | C26 + AICAR | <0.0001 | **     |
| 8      | C     | Saline  | C26 + MET   | <0.0001 | **     |
| 8      | C     | C26     | C26 + AICAR | <0.0001 | ††     |
| 8      | C     | C26     | C26 + MET   | 0.0194  | †      |
| 8      | D     | Saline  | C26         | 0.0043  | **     |
| 8      | D     | Saline  | C26 + AICAR | 0.0956  | -      |
| 8      | D     | Saline  | C26 + MET   | 0.0081  | **     |
| 8      | D     | C26     | C26 + AICAR | 0.0743  | -      |
| 8      | D     | C26     | C26 + MET   | 0.6698  | -      |
| 8      | E     | Saline  | C26         | 0.0190  | *      |
| 8      | E     | Saline  | C26 + AICAR | 0.0690  | -      |
| 8      | E     | Saline  | C26 + MET   | 0.0268  | *      |
| 8      | E     | C26     | C26 + AICAR | 0.4305  | -      |
| 8      | E     | C26     | C26 + MET   | 0.8296  | -      |

Abbreviations: MET, metformin.

**Appendix Table S10. Figure 9 Significance p-values**

| Figure | Panel | Control | Treatment   | p-value | Symbol |
|--------|-------|---------|-------------|---------|--------|
| 9      | A     | PF      | LPS         | <0.0001 | **     |
| 9      | A     | PF      | LPS + AICAR | 0.1205  | -      |
| 9      | A     | PF      | LPS + MET   | <0.0001 | **     |
| 9      | A     | LPS     | LPS + AICAR | <0.0001 | -      |
| 9      | A     | LPS     | LPS + MET   | 0.9987  | -      |
| 9      | B     | PF      | LPS         | 0.0194  | *      |
| 9      | B     | PF      | LPS + AICAR | 0.5364  | -      |
| 9      | B     | PF      | LPS + MET   | 0.0233  | *      |
| 9      | B     | LPS     | LPS + AICAR | 0.0670  | -      |
| 9      | B     | LPS     | LPS + MET   | 0.9297  | -      |
| 9      | C     | PF      | LPS         | 0.0026  | **     |
| 9      | C     | PF      | LPS + AICAR | 0.1666  | -      |
| 9      | C     | PF      | LPS + MET   | 0.0040  | **     |
| 9      | C     | LPS     | LPS + AICAR | 0.0506  | -      |
| 9      | C     | LPS     | LPS + MET   | 0.8428  | -      |

Abbreviations: PF, pair-fed controls. MET, metformin.

**Appendix Table S11. Figure EV3 Significance p-values**

| Figure | Panel | Control | Treatment   | p-value | Symbol |
|--------|-------|---------|-------------|---------|--------|
| EV3    | A     | C26     | C26 + AICAR | 0.0113  | †      |
| EV3    | A     | C26     | C26 + MET   | 0.0180  | †      |
| EV3    | B     | Saline  | C26         | 0.0078  | **     |
| EV3    | B     | Saline  | C26 + AICAR | 0.7341  | -      |
| EV3    | B     | Saline  | C26 + MET   | 0.7652  | -      |
| EV3    | B     | C26     | C26 + AICAR | 0.0047  | -      |
| EV3    | B     | C26     | C26 + MET   | 0.0050  | -      |

Abbreviations: MET, metformin.

**Appendix Table S12. Figure EV4 Significance p-values**

| Figure | Panel       | Control             | Treatment           | p-value | Symbol |
|--------|-------------|---------------------|---------------------|---------|--------|
| EV4    | B           | Day 14, Saline      | Day 14, C26         | 0.0107  | *      |
| EV4    | B           | Day 14, Saline      | Day 14, C26 + AICAR | 0.0049  | **     |
| EV4    | B           | Day 21, Saline      | Day 21, C26         | <0.0001 | **     |
| EV4    | B           | Day 21, Saline      | Day 21, C26 + AICAR | 0.0004  | **     |
| EV4    | B           | Day 14, Saline      | Day 21, Saline      | 0.9795  | -      |
| EV4    | B           | Day 14, C26         | Day 21, C26         | 0.0001  | **     |
| EV4    | B           | Day 14, C26 + AICAR | Day 21, C26 + AICAR | 0.0889  | NS     |
| EV4    | C, Atrogin1 | Saline              | C26                 | 0.0003  | **     |
| EV4    | C, Atrogin1 | Saline              | C26 + AICAR         | 0.3442  | -      |
| EV4    | C, Atrogin1 | C26                 | C26 + AICAR         | 0.0012  | -      |
| EV4    | C, MuRF1    | Saline              | C26                 | 0.0074  | **     |
| EV4    | C, MuRF1    | Saline              | C26 + AICAR         | 0.0173  | *      |
| EV4    | C, MuRF1    | C26                 | C26 + AICAR         | 0.6088  | -      |

Abbreviations: NS, not significant



**Appendix Table S13. Figure EV5 Significance p-values**

| Figure | Panel | Control                    | Treatment                          | p-value | Symbol |
|--------|-------|----------------------------|------------------------------------|---------|--------|
| EV5    | A     | Saline                     | AICAR                              | 0.6095  | -      |
| EV5    | A     | Saline                     | IFN $\gamma$ /TNF $\alpha$         | 0.0010  | **     |
| EV5    | A     | Saline                     | IFN $\gamma$ /TNF $\alpha$ + AICAR | 0.0010  | **     |
| EV5    | A     | IFN $\gamma$ /TNF $\alpha$ | IFN $\gamma$ /TNF $\alpha$ + AICAR | 0.9099  | -      |
| EV5    | B     | Saline                     | AICAR                              | 0.4364  | -      |
| EV5    | B     | Saline                     | IFN $\gamma$ /TNF $\alpha$         | 0.0244  | *      |
| EV5    | B     | Saline                     | IFN $\gamma$ /TNF $\alpha$ + AICAR | 0.7582  | NS     |
| EV5    | B     | IFN $\gamma$ /TNF $\alpha$ | IFN $\gamma$ /TNF $\alpha$ + AICAR | 0.0554  | -      |

Abbreviations: NS, not significant

**Appendix Table S14. Table 1 Significance p-values**

| Table | Variable           | Control | Treatment   | p-value | Symbol |
|-------|--------------------|---------|-------------|---------|--------|
| 1     | Body Weight Change | Saline  | C26         | <0.0001 | **     |
| 1     | Body Weight Change | Saline  | C26 + AICAR | <0.0001 | **     |
| 1     | Body Weight Change | Saline  | C26 + MET   | <0.0001 | **     |
| 1     | Body Weight Change | C26     | C26 + AICAR | 0.0004  | ††     |
| 1     | Body Weight Change | C26     | C26 + MET   | 0.2284  | -      |
| 1     | Tibialis Anterior  | Saline  | C26         | <0.0001 | **     |
| 1     | Tibialis Anterior  | Saline  | C26 + AICAR | 0.0160  | *      |
| 1     | Tibialis Anterior  | Saline  | C26 + MET   | <0.0001 | **     |
| 1     | Tibialis Anterior  | C26     | C26 + AICAR | 0.0341  | †      |
| 1     | Tibialis Anterior  | C26     | C26 + MET   | 0.7884  | -      |
| 1     | Gastrocnemius      | Saline  | C26         | <0.0001 | **     |
| 1     | Gastrocnemius      | Saline  | C26 + AICAR | 0.0006  | **     |
| 1     | Gastrocnemius      | Saline  | C26 + MET   | <0.0001 | **     |
| 1     | Gastrocnemius      | C26     | C26 + AICAR | 0.0107  | †      |
| 1     | Gastrocnemius      | C26     | C26 + MET   | 0.4784  | -      |
| 1     | Fat Pad            | Saline  | C26         | <0.0001 | **     |
| 1     | Fat Pad            | Saline  | C26 + AICAR | <0.0001 | **     |
| 1     | Fat Pad            | Saline  | C26 + MET   | <0.0001 | **     |
| 1     | Fat Pad            | C26     | C26 + AICAR | 0.6562  | -      |
| 1     | Fat Pad            | C26     | C26 + MET   | 0.9207  | -      |
| 1     | Tumor              | C26     | C26 + AICAR | 0.8997  | -      |
| 1     | Tumor              | C26     | C26 + MET   | 0.8605  | -      |
| 1     | IL-6               | Saline  | C26         | 0.0019  | **     |
| 1     | IL-6               | Saline  | C26 + AICAR | 0.0105  | *      |
| 1     | IL-6               | Saline  | C26 + MET   | 0.1123  | -      |
| 1     | IL-6               | C26     | C26 + AICAR | 0.3767  | -      |
| 1     | IL-6               | C26     | C26 + MET   | 0.0455  | †      |

Abbreviations: MET, metformin.

**Appendix Table S15. Table 2 Significance p-values**

| Table | Variable           | Control | Treatment   | p-value | Symbol |
|-------|--------------------|---------|-------------|---------|--------|
| 2     | Body Weight Change | PF      | Veh.        | <0.0001 | **     |
| 2     | Body Weight Change | PF      | LPS         | 0.4611  | -      |
| 2     | Body Weight Change | PF      | LPS + AICAR | 0.0221  | *      |
| 2     | Body Weight Change | PF      | LPS + MET   | 0.1424  | -      |
| 2     | Body Weight Change | LPS     | LPS + AICAR | 0.0032  | -      |
| 2     | Body Weight Change | LPS     | LPS + MET   | 0.4569  | -      |
| 2     | Tibialis Anterior  | PF      | Veh.        | 0.6981  | -      |
| 2     | Tibialis Anterior  | PF      | LPS         | 0.0080  | **     |
| 2     | Tibialis Anterior  | PF      | LPS + AICAR | 0.5768  | -      |
| 2     | Tibialis Anterior  | PF      | LPS + MET   | 0.0268  | *      |
| 2     | Tibialis Anterior  | LPS     | LPS + AICAR | 0.0316  | -      |
| 2     | Tibialis Anterior  | LPS     | LPS + MET   | 0.6255  | -      |
| 2     | Gastrocnemius      | PF      | Veh.        | 0.0740  | -      |
| 2     | Gastrocnemius      | PF      | LPS         | 0.0330  | *      |
| 2     | Gastrocnemius      | PF      | LPS + AICAR | 0.8263  | -      |
| 2     | Gastrocnemius      | PF      | LPS + MET   | 0.0368  | *      |
| 2     | Gastrocnemius      | LPS     | LPS + AICAR | 0.0539  | -      |
| 2     | Gastrocnemius      | LPS     | LPS + MET   | 0.9629  | -      |
| 2     | Fat Pad            | PF      | Veh.        | 0.9299  | -      |
| 2     | Fat Pad            | PF      | LPS         | 0.6192  | -      |
| 2     | Fat Pad            | PF      | LPS + AICAR | 0.9013  | -      |
| 2     | Fat Pad            | PF      | LPS + MET   | 0.5519  | -      |
| 2     | Fat Pad            | LPS     | LPS + AICAR | 0.5351  | -      |
| 2     | Fat Pad            | LPS     | LPS + MET   | 0.9215  | -      |

Abbreviations: PF, pair-fed controls. Veh., Vehicle. MET, metformin.
