# Supplementary material for: The AMPK agonist 5‐aminoimidazole‐4‐carboxamide ribonucleotide (AICAR), but not metformin, prevents inflammation‐associated cachectic muscle wasting
Source: PubMed Central journal article supplement (PMC6034131; doi:10.15252/emmm.201708307), 2018-05-29

# Figure 1 - Panel A

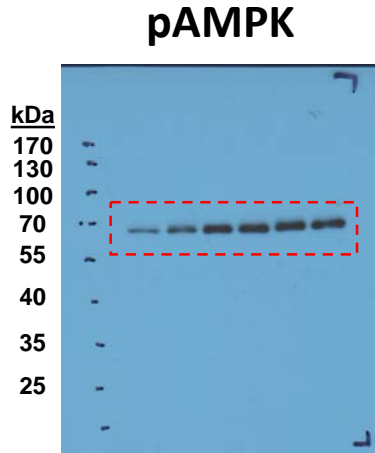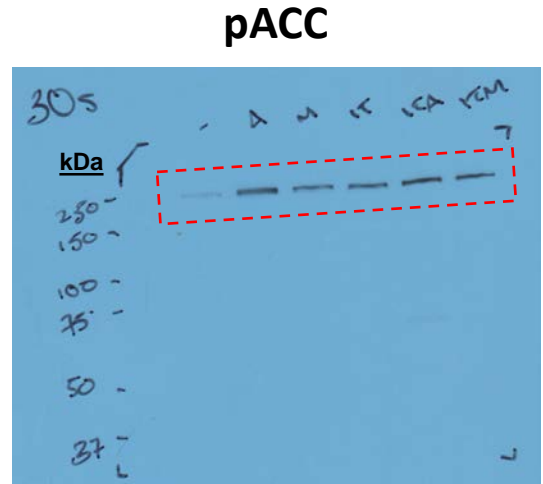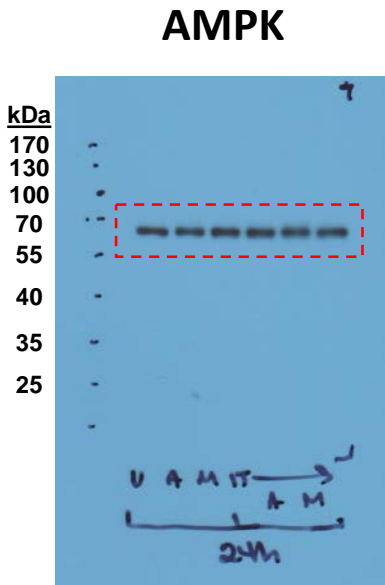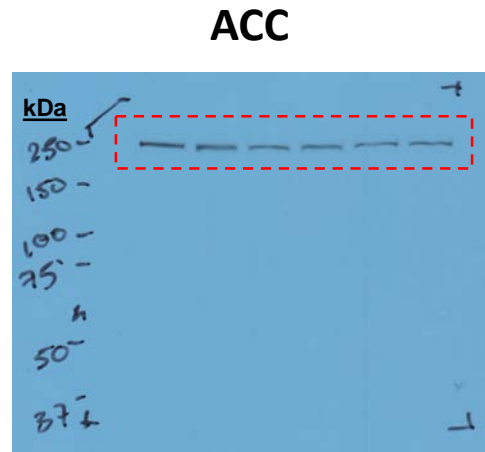

Abbreviations: U or "-", non-treated. A, AICAR. M, metformin. IT, IFN $\gamma$ /TNF $\alpha$

**Figure 1 - Panel B**

**Non-treated**

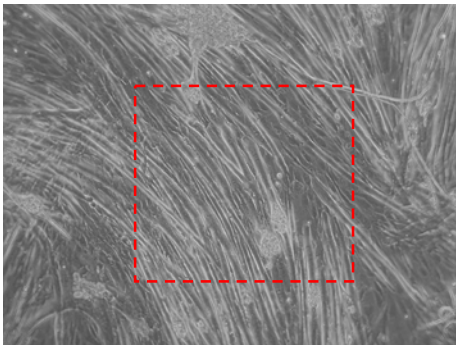

**AICAR**

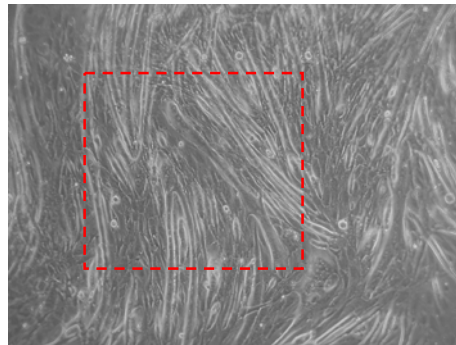

**Metformin**

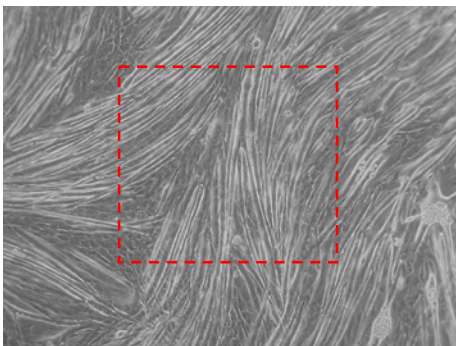

**IFN $\gamma$ /TNF $\alpha$**

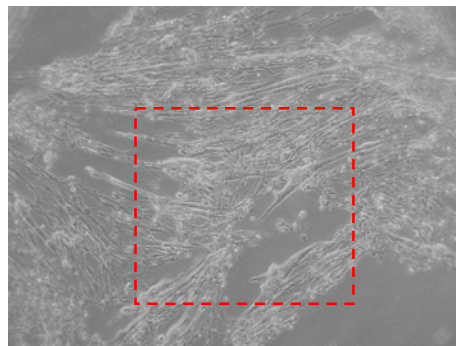

**IFN $\gamma$ /TNF $\alpha$  + AICAR**

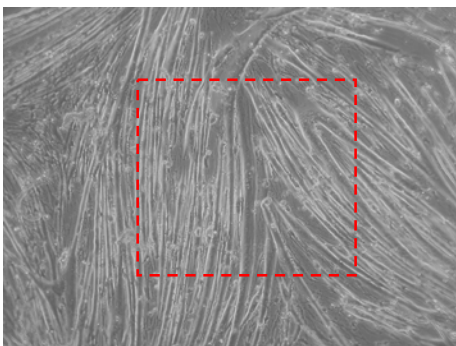

**IFN $\gamma$ /TNF $\alpha$  + MET**

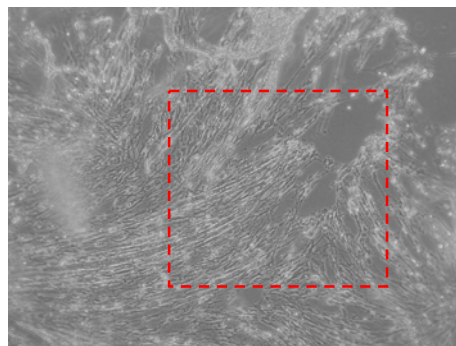

Supplement: EMMM-10-e8307-s003.pdf [file EMMM-10-e8307-s003.pdf]
