# Supplementary material for: The AMPK agonist 5‐aminoimidazole‐4‐carboxamide ribonucleotide (AICAR), but not metformin, prevents inflammation‐associated cachectic muscle wasting
Source: PubMed Central journal article supplement (PMC6034131; doi:10.15252/emmm.201708307), 2018-05-29
Supplement: EMMM-10-e8307-s004.pdf [file EMMM-10-e8307-s004.pdf]

# Figure 3 - Panel A

pS6K

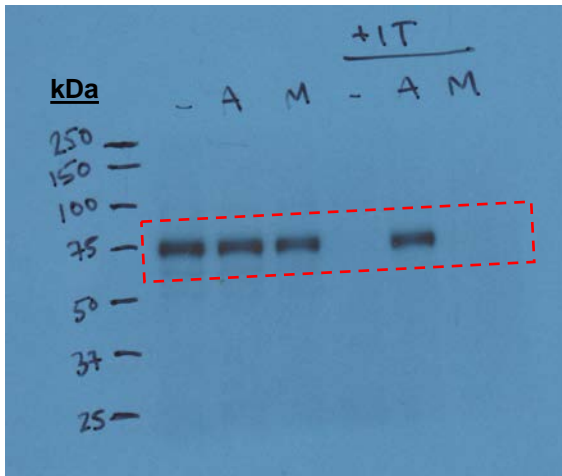

pS6

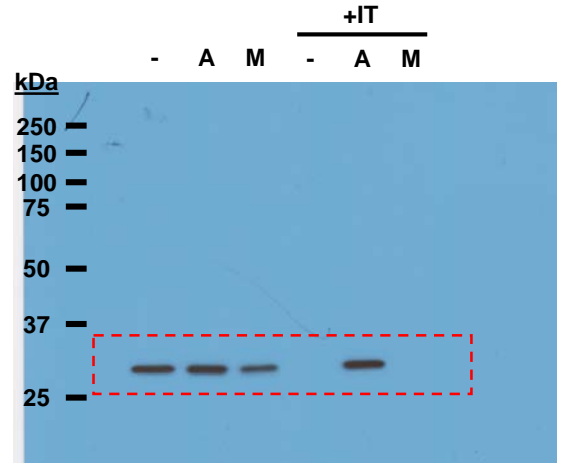

S6K

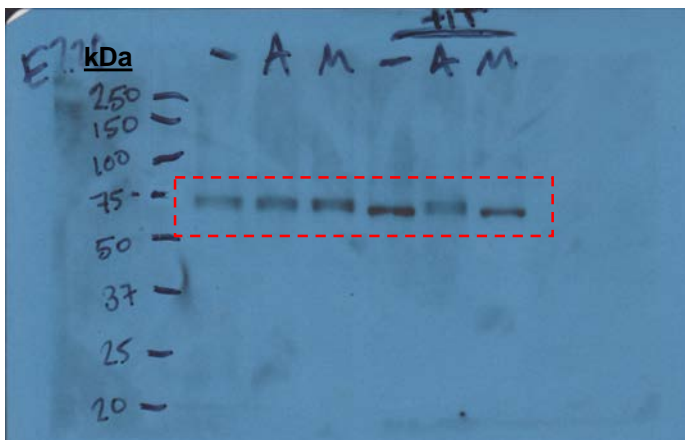

S6

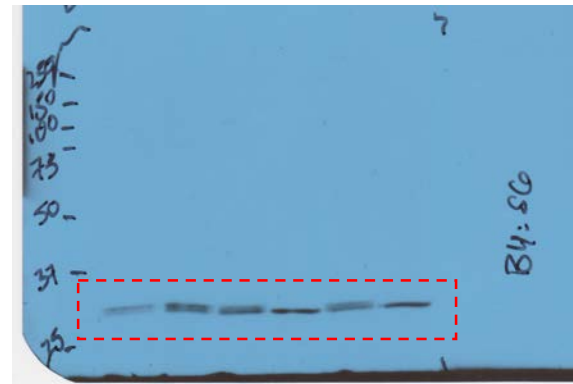

Abbreviations: "-", non-treated. A, AICAR. M, metformin. IT, IFN $\gamma$ /TNF $\alpha$

# Figure 3 - Panel B

## 35-S Labelling

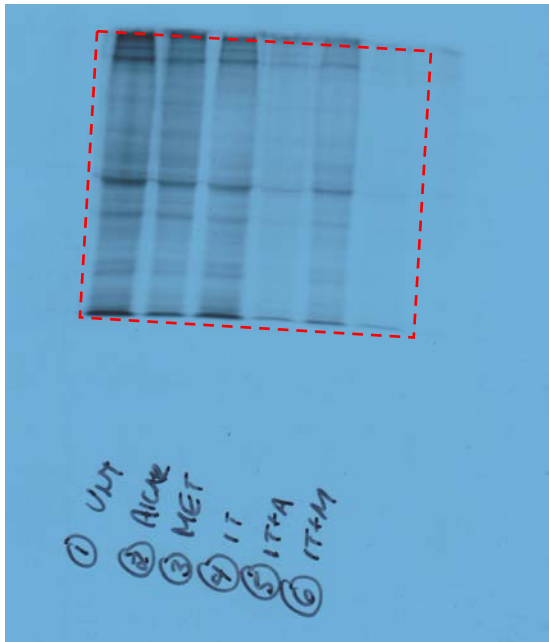

## Coomassie Staining

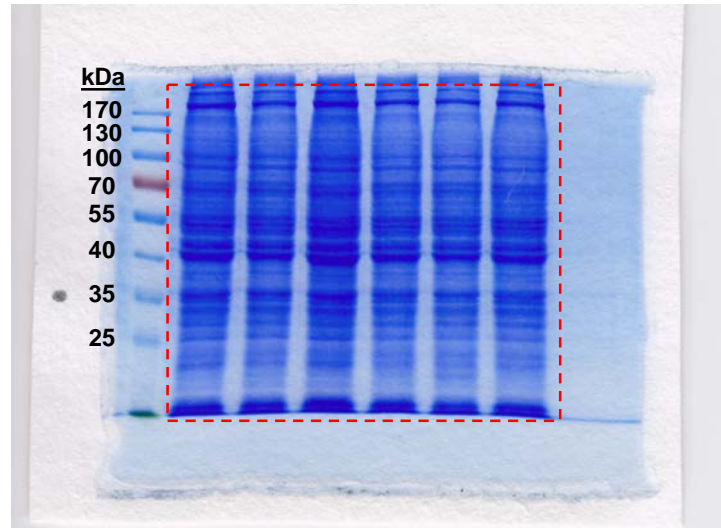

Abbreviations: UNT, non-treated. A, AICAR. M, metformin. IT, IFN $\gamma$ /TNF $\alpha$
