# Supplementary material for: The AMPK agonist 5‐aminoimidazole‐4‐carboxamide ribonucleotide (AICAR), but not metformin, prevents inflammation‐associated cachectic muscle wasting
Source: PubMed Central journal article supplement (PMC6034131; doi:10.15252/emmm.201708307), 2018-05-29
Supplement: EMMM-10-e8307-s006.pdf [file EMMM-10-e8307-s006.pdf]

# Figure 5 - Panel A

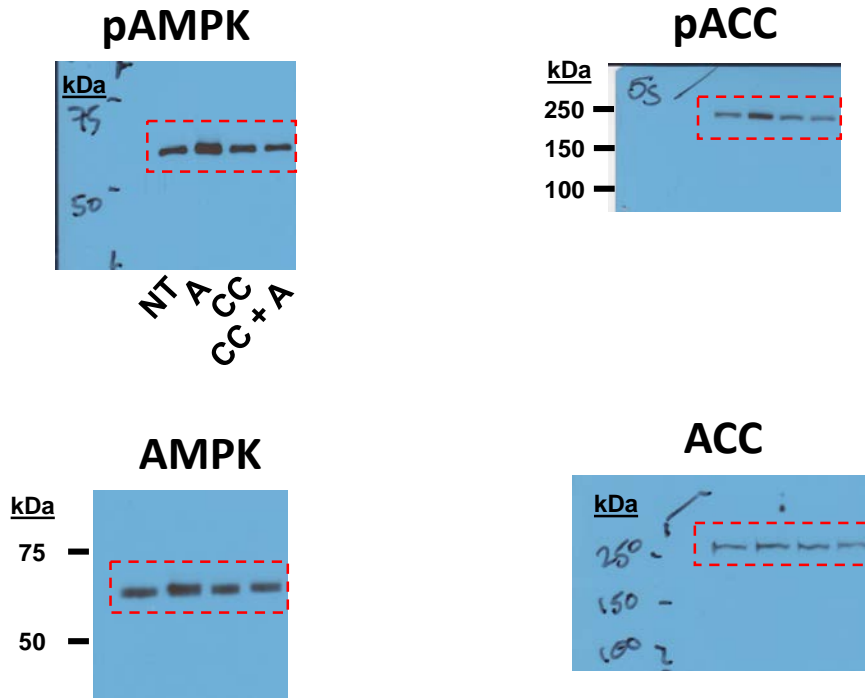

Abbreviations: NT, non-treated. A, AICAR. CC, Compound C.

# Figure 5 - Panel E

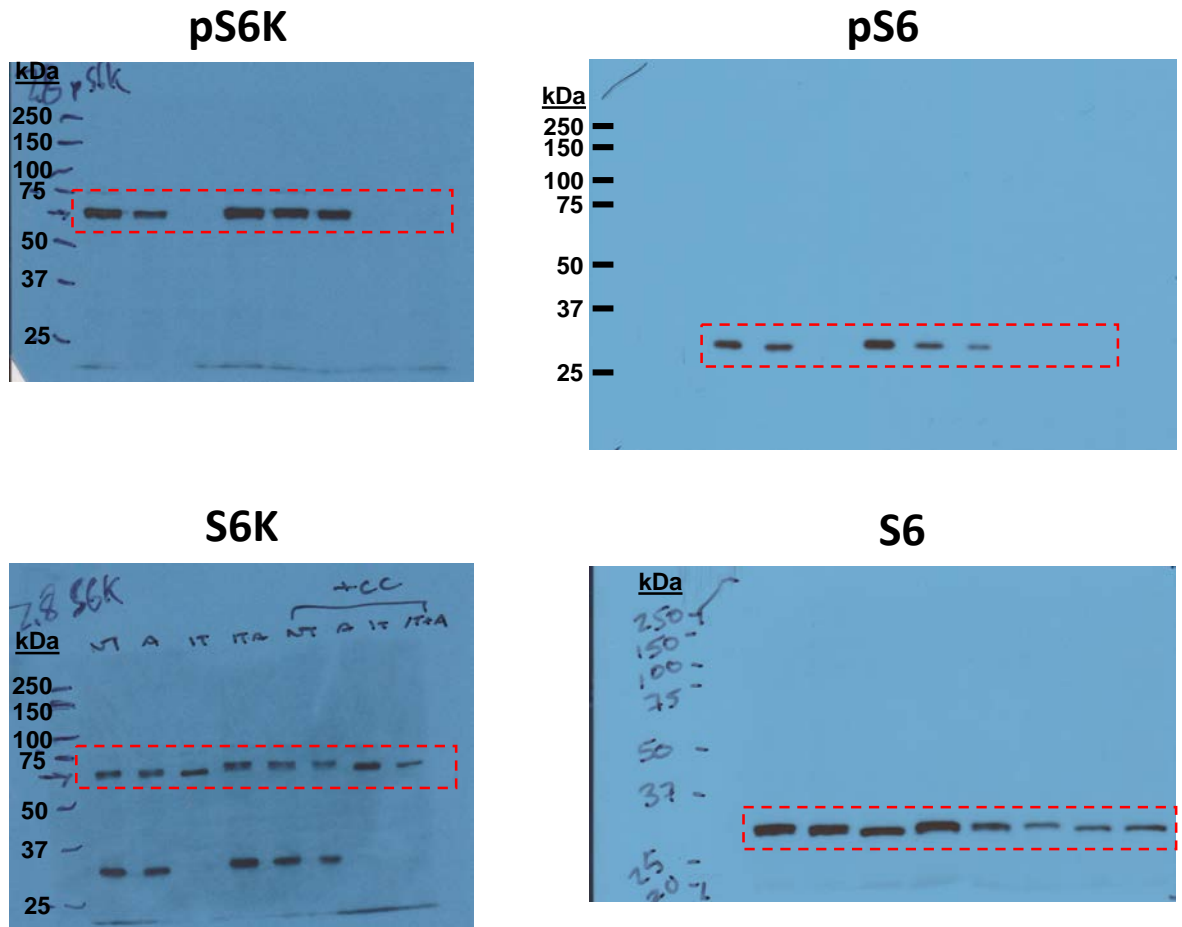

Abbreviations: NT, non-treated. A, AICAR. CC, Compound C. IT, IFN $\gamma$ /TNF $\alpha$

# Figure 5 - Panel F

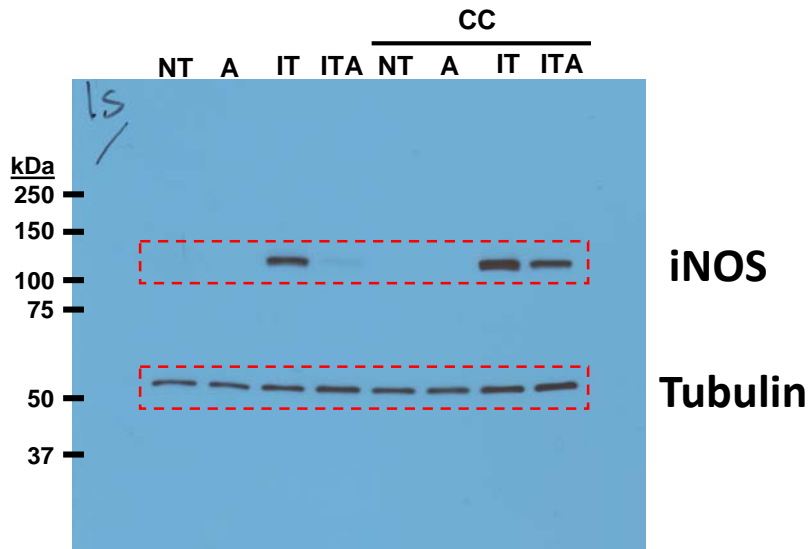

Abbreviations: NT, non-treated. A, AICAR. CC, Compound C. IT, IFN $\gamma$ /TNF $\alpha$
