# Supplementary material for: The AMPK agonist 5‐aminoimidazole‐4‐carboxamide ribonucleotide (AICAR), but not metformin, prevents inflammation‐associated cachectic muscle wasting
Source: PubMed Central journal article supplement (PMC6034131; doi:10.15252/emmm.201708307), 2018-05-29
Supplement: EMMM-10-e8307-s007.pdf [file EMMM-10-e8307-s007.pdf]

# Figure 6 - Panel D

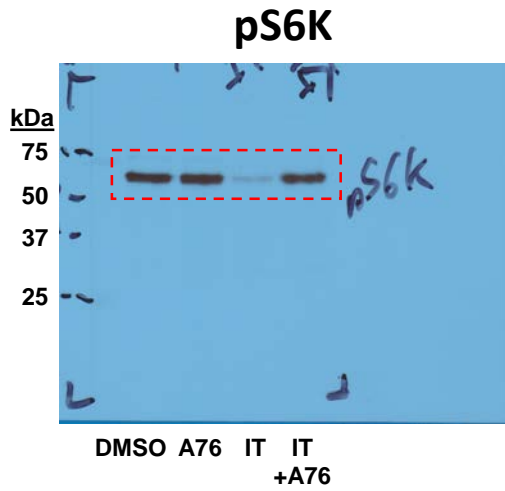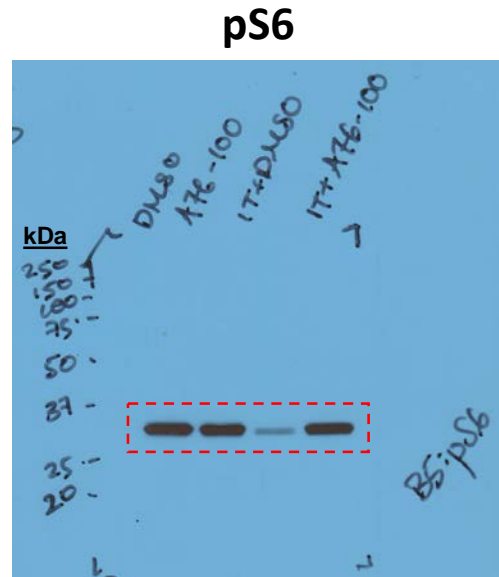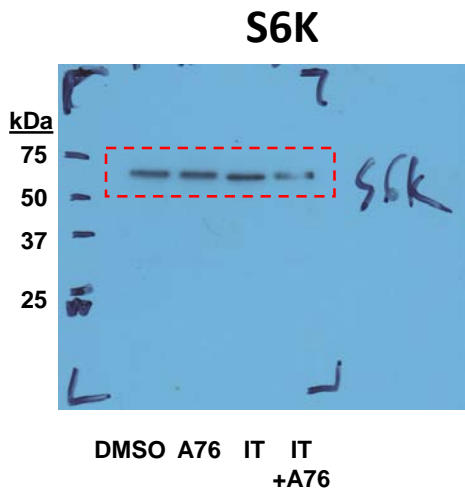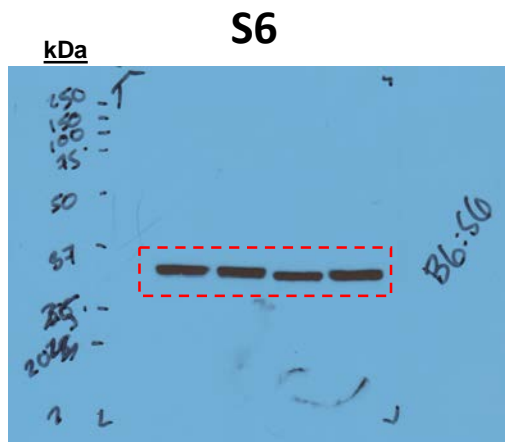

Abbreviations: A76, A-769662. IT, IFN $\gamma$ /TNF $\alpha$

# Figure 6 - Panel E

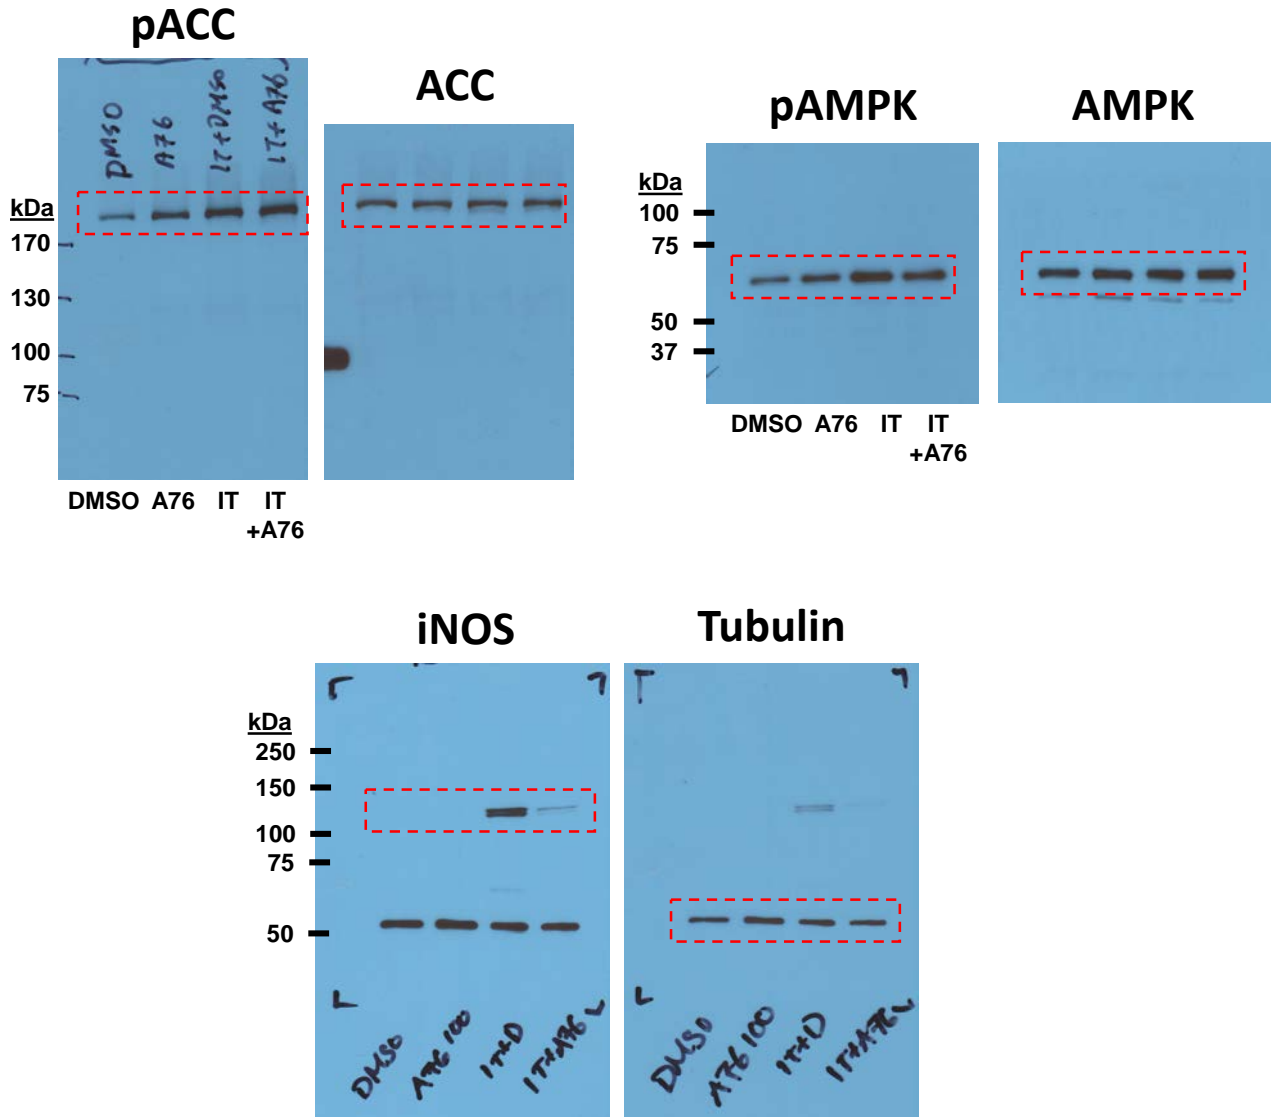

Abbreviations: A76, A-769662. IT, IFN $\gamma$ /TNF $\alpha$
