# Supplementary material for: The AMPK agonist 5‐aminoimidazole‐4‐carboxamide ribonucleotide (AICAR), but not metformin, prevents inflammation‐associated cachectic muscle wasting
Source: PubMed Central journal article supplement (PMC6034131; doi:10.15252/emmm.201708307), 2018-05-29
Supplement: EMMM-10-e8307-s008.pdf [file EMMM-10-e8307-s008.pdf]

# Figure 7 - Panel B

## iNOS

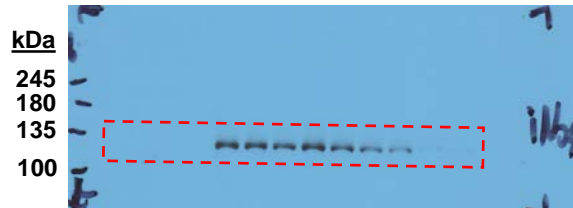

## Tubulin

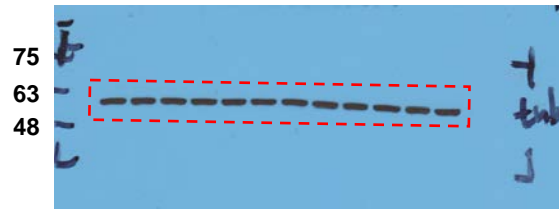

|                          |   |    |    |   |    |    |   |                            |     |     |     |     |     |
|--------------------------|---|----|----|---|----|----|---|----------------------------|-----|-----|-----|-----|-----|
| A-76 ( $\mu\text{M}$ ):  | - | 25 | 50 | - | 25 | 50 | - | 25                         | 50  | -   | 25  | 50  |     |
| AICAR ( $\mu\text{M}$ ): | - | -  | -  | - | -  | -  | - | 125                        | 125 | 125 | 250 | 250 | 250 |
|                          |   |    |    |   |    |    |   | IFN $\gamma$ /TNF $\alpha$ |     |     |     |     |     |

Abbreviations: A76, A-769662.

# Figure 7 - Panel C

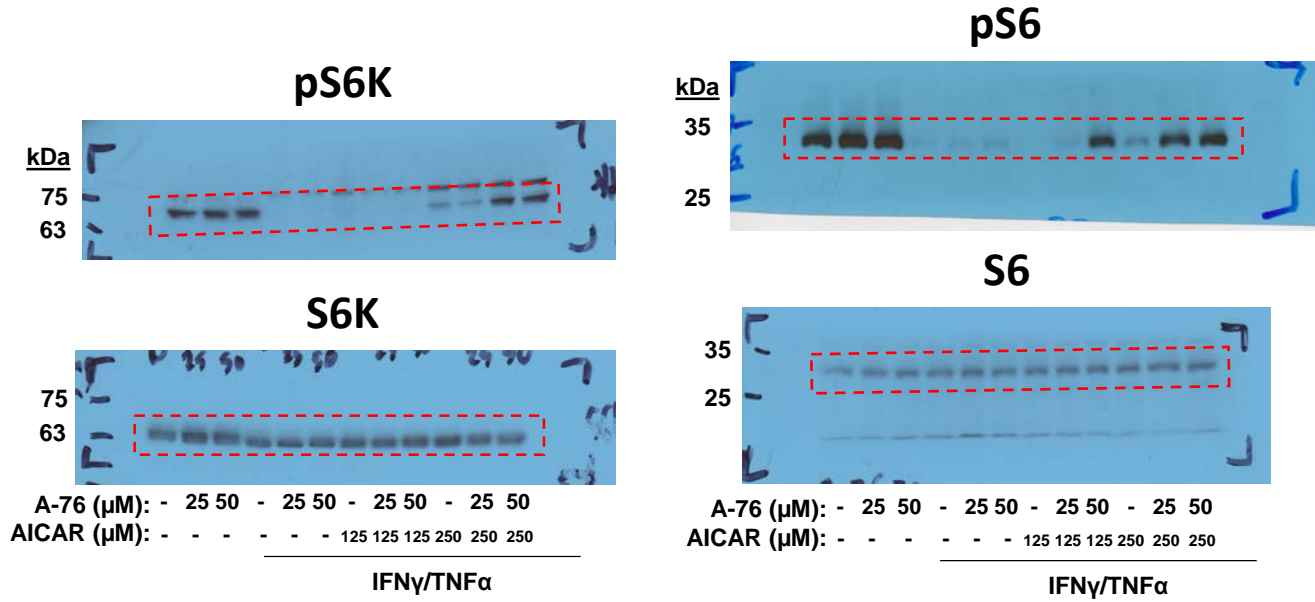

Abbreviations: A76, A-769662.
