# Supplementary material for: The AMPK agonist 5‐aminoimidazole‐4‐carboxamide ribonucleotide (AICAR), but not metformin, prevents inflammation‐associated cachectic muscle wasting
Source: PubMed Central journal article supplement (PMC6034131; doi:10.15252/emmm.201708307), 2018-05-29
Supplement: EMMM-10-e8307-s010.pdf [file EMMM-10-e8307-s010.pdf]

# Figure 9 - Panel A

**PF**

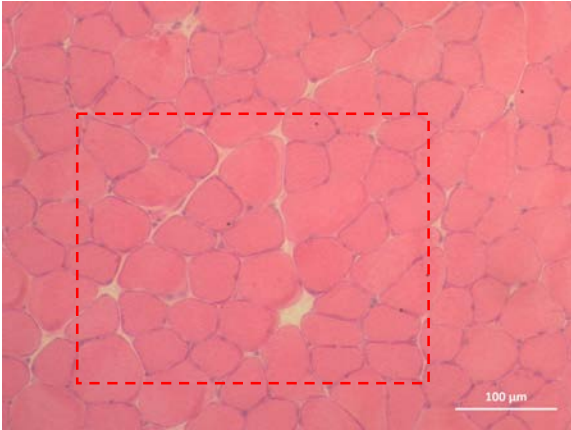

**LPS**

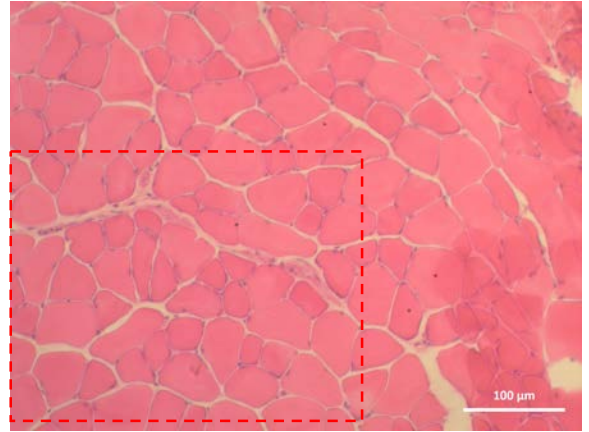

**LPS + A**

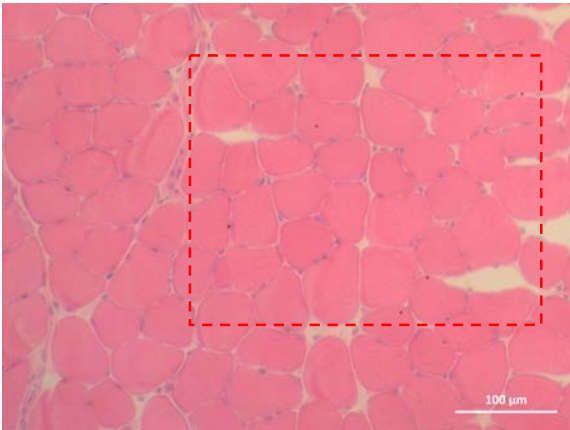

**LPS + M**

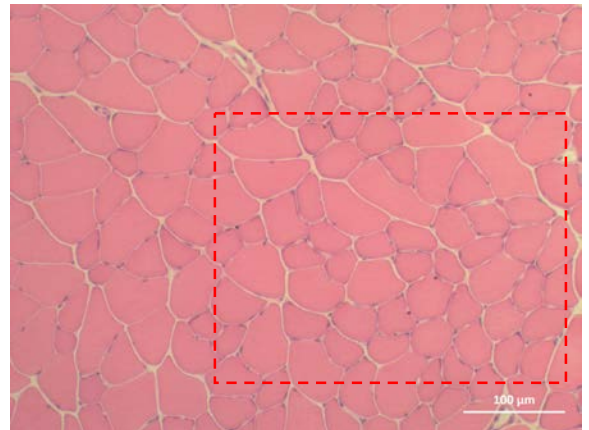

Abbreviations: PF, pair-fed. A, AICAR. M, metformin.
